# Supplementary material
Source: Springer Nature journal article supplement (https://www.springermedizin.de/resource/supplementary/12885_2012_3213_MOESM3_ESM.pdf/9463198)
Supplement: MOESM3 [file 9463198]

| Additional file 3.                                                                          |                         |                           |     |
|---------------------------------------------------------------------------------------------|-------------------------|---------------------------|-----|
| Correlation between CD163 in tumor stroma and granulin expression in primary breast cancer. |                         |                           |     |
| Clinicopathologic features                                                                  | CD163                   |                           |     |
|                                                                                             | Tumor stroma            |                           |     |
|                                                                                             | Correlation coefficient | <i>P</i> value (2-tailed) | N   |
| Granulin                                                                                    | 0.248**                 | .01                       | 108 |
